# Supplementary material for: A novel mapping strategy utilizing mouse chromosome substitution strains identifies multiple epistatic interactions that regulate complex traits
Source: bioRxiv preprint, doi:10.1101/2020.04.10.034637, version 3 (2020-08-17)
Supplement: Supplemental Table 1 [file 034637_file03.xlsx]

## Sheet: GENOTYPES
TABLE S1. RAW GENOTYPE DATA		Chromosome 4
Sample_ID	Alleles		SNP001_rs13478938	SNP002_rs13477536	SNP003_rs13478705	SNP004_rs13477808	SNP005_rs13478971	SNP006_rs3724683	SNP007_rs13478817	SNP008_rs13477916	SNP009_rs13478916	SNP010_rs13478667	SNP011_rs13477607	SNP012_rs13477839	SNP013_rs13478797	SNP014_rs13478811	SNP015_rs13477965	SNP016_rs13478871	SNP017_rs13477745	SNP018_rs13477851	SNP019_rs13477644	SNP020_rs13478907	SNP021_rs13477683	SNP022_rs13479076	SNP023_rs13477717	SNP024_rs13477993	SNP025_rs6184584	SNP026_rs13478011	SNP027_rs3712161	SNP028_rs13479032	SNP029_rs13478619	SNP030_rs13459096	SNP031_rs13477555	SNP032_rs13478638	SNP033_rs13479079	SNP034_rs13479051	SNP035_rs13478003	SNP036_rs13477864	SNP037_rs13477735	SNP038_rs13478655	SNP039_rs13478825	SNP040_rs13477973	SNP041_rs13479022	SNP042_rs13477881	SNP043_rs13478752	SNP044_rs3023083	SNP045_rs13478626	SNP046_rs13478019	SNP047_rs3089514
	Allele_1		A	T	G	T	G	A	A	C	T	C	G	G	A	T	C	G	T	T	A	T	C	G	C	T	A	T	T	G	C	T	G	G	C	T	A	T	T	T	G	C	C	T	T	T	A	C	G
	Allele_2		G	G	A	C	C	G	C	T	C	T	A	T	G	A	T	A	A	C	G	C	T	T	A	C	G	C	C	A	T	C	A	T	G	C	C	C	C	A	A	A	A	C	C	C	G	T	A
I88			A	T / G	G	T	G	A	A	C	T	FAIL	FAIL	G	A	T	C	G	T	T	A / G	T	C	G	C	T	A	T	T	G	C	T	G / A	G	C	T	A	T	T	T	G	C	C	T	T	T	A	C	G
I89			A / G	T / G	G / A	T / C	G / C	A	A	C / T	T / C	FAIL	FAIL	G / T	A	T / A	C	G / A	T / A	T / C	A / G	T / C	C / T	G / T	C / A	T	A / G	T	T / C	G / A	C / T	T / C	G / A	G / T	C	T / C	A	T / C	T / C	T / A	G / A	C	C / A	T / C	T / C	T / C	A / G	C	G
I90			A	T / G	G	T / C	G	A	A	C / T	T	FAIL	FAIL	G / T	A	T	C / T	G	T / A	T / C	A / G	T	C / T	G	C / A	T	A / G	T	T	G	C	T	G / A	G	C	T	A	T / C	T / C	T	G	C / A	C	T / C	T	T	A	C	G / A
I91			A / G	T / G	G / A	T / C	G / C	A	A	C / T	T / C	FAIL	FAIL	G / T	A	T / A	C / T	G / A	T / A	T / C	A / G	T / C	C / T	G / T	C / A	T / C	A / G	T	T / C	G / A	C / T	T / C	G / A	G / T	C	T / C	A / C	T / C	T / C	T / A	G / A	C / A	C / A	T / C	T / C	T / C	A / G	C	G / A
I92			A	T	G	T	G	A	A	C	T	FAIL	FAIL	G	A	T	C	G	T	T	A	T	C	G	C	T	A	T	T	G	C	T	G	G	C	T	A	T	T	T	G	C	C	T	T	T	A	C	G
I93			A / G	T	G	T	G / C	A	A	C	T / C	C	G	G	A	T / A	C	G / A	T	T	A	T / C	C	G	C	T	A	T	T / C	G	C	T	G	G	C	T	A	T	T	T	G / A	C	C / A	T	T	T / C	A	C	G
I94			A / G	T	G	T	G / C	A	A	C	T / C	C	G	G	A	T	C	G	T	T	A	T / C	C	G / T	C	T	A	T	T / C	G / A	C	T	G	G	C	T / C	A	T	T	T	G	C	C / A	T	T	T / C	A	C	G
I95			A	T	G / A	T	G	A	A	C	T	C / T	G	G	A	T / A	C	G / A	T	T	A	T	C	G	C	T	A	T	T	G	C / T	T / C	G	G / T	C	T	A	T	T	T / A	G / A	C	C	T	T / C	T	A / G	C	G
I96			A / G	T	G / A	T	G / C	A	A	C / T	T / C	C / T	FAIL	G	A	T / A	C / T	G / A	T	T	A	T / C	C	G	C	T / C	A	T / C	T / C	G	C / T	T / C	G	G / T	C	T	A / C	T	T	T / A	G / A	C / A	C	T	T / C	T / C	A / G	C	G / A
I97			A	T	G / A	T	G	A	A	C	T	FAIL	FAIL	G	A	T	C	G	T	T	A	T	C	G / T	C	T	A	T	T	G / A	C / T	T / C	G	G / T	C	T / C	A	T	T	T / A	G	C	C / A	T	T	T	A / G	C	G
I98			A / G	T	G	T / C	G / C	A	A	C / T	T / C	FAIL	FAIL	G / T	A	T	C / T	G / A	T / A	T / C	A / G	T / C	C / T	G / T	C / A	T / C	A / G	T / C	T / C	G / A	C	T	G	G	C	T / C	A / C	T / C	T / C	T	G	C / A	C / A	T / C	T	T / C	A	C	G / A
I99			A	T / G	G	T / C	G	A	A	C / T	T	FAIL	G / A	G / T	A	T	C / T	G	T / A	T / C	A / G	T	C / T	G / T	C / A	T / C	A / G	T / C	T	G / A	C / T	T / C	G / A	G / T	C	T / C	A / C	T / C	T / C	T / A	G	C / A	C	T / C	T	T	A / G	C	G / A
I101			A	T	G	T	G	A	A	C	T	FAIL	G	G	A	T / A	C / T	G / A	T	T	A	T	C	G	C	T / C	A	T / C	T / C	G	C	T	G	G	C	T	A / C	T	T	T	G / A	C / A	C	T	T / C	T	A	C	G / A
I102			A / G	T / G	G / A	T / C	G / C	A	A	C / T	T / C	C / T	G / A	G / T	A	T / A	C / T	G / A	T / A	T / C	A / G	T / C	C / T	G / T	C / A	T / C	A / G	T / C	T / C	G / A	C / T	T / C	G / A	G / T	C	T / C	A / C	T / C	T / C	T / A	G / A	C / A	C / A	T / C	T / C	T / C	A / G	C	G / A
I103			A / G	T	G	T	G / C	A	A	C	T / C	FAIL	FAIL	G	A	T / A	C	G / A	T	T	A	T / C	C	G	C	T	A	T	T / C	G / A	C	T	G	G	C	T / C	A	T	T	T	G / A	C	C / A	T	T	T / C	A	C	G
I104			A / G	T	G / A	T	G / C	A	A	C	T / C	C / T	G	G	A	T / A	C	G / A	T	T	A	T / C	C	G / T	C	T	A	T	T / C	G / A	C / T	T / C	G	G / T	C	T / C	A	T	T	T / A	G / A	C	C / A	T	T / C	T / C	A / G	C	G
I105			A	T	G	T / C	G	A	A	C / T	T	C	FAIL	G / T	A	T	C / T	G	T / A	T / C	A / G	T	C / T	G	C / A	T / C	A / G	T / C	T	G	C	T	G	G	C	T	A / C	T / C	T / C	T	G	C / A	C	T / C	T	T	A	C	G / A
I106			A	T / G	G	T / C	G	A	A	C / T	T	FAIL	FAIL	G / T	A	T	C / T	G	T / A	T / C	A / G	T	C / T	G / T	C / A	T	A / G	T	T	G / A	C	T	G / A	G	C	T / C	A	T / C	T / C	T	G	C / A	C / A	T / C	T	T	A	C	G / A
I107			A / G	T / G	G / A	T	G / C	A	A	C	T / C	FAIL	FAIL	G	A	T / A	C	G / A	T	T	A / G	T / C	C	G	C	T	A	T	T / C	G / A	C	T	G / A	G / T	C	T / C	A	T	T	T / A	G / A	C	C / A	T	T / C	T / C	A	C	G
I108			A	T	G	T	G	A	A	C	T	FAIL	FAIL	G	A	T	C	G	T	T	A	T	C	G	C	T	A	T	T	G	C	T	G	G	C	T	A	T	T	T	G	C	C	T	T	T	A	C	G
I109			A	T / G	G	T / C	G	A	A	C / T	T	FAIL	FAIL	G / T	A	T	C / T	G	T / A	T / C	A / G	T	C / T	G	C / A	T / C	A / G	T	T	G	C	T	G / A	G	C	T	A / C	T / C	T / C	T	G	C / A	C	T / C	T	T	A	C	G / A
I111			A / G	T	G / A	T / C	G / C	A	A	C / T	T / C	FAIL	FAIL	G / T	A	T / A	C / T	G / A	T / A	T / C	A	T / C	C	G	C	T / C	A / G	T / C	T / C	G / A	C / T	T / C	G	G / T	C	T / C	A / C	T / C	T / C	T / A	G / A	C / A	C / A	T / C	T / C	T / C	A / G	C	G / A
I112			A	T / G	G / A	T / C	G	A	A	C / T	T	C / T	G / A	G / T	A	T	C / T	G	T / A	T / C	A / G	T	C / T	G	C / A	T / C	A / G	T / C	T	G	C / T	T / C	G / A	G / T	C	T	A / C	T / C	T / C	T / A	G	C / A	C	T / C	T	T	A / G	C	G / A
I113			A	T / G	G	T / C	G	A	A	C / T	T	FAIL	FAIL	G / T	A	T	C	G	T / A	T / C	A / G	T	C / T	G	C / A	T	A / G	T	T	G	C / T	T / C	G / A	G / T	C	T	A	T / C	T / C	T / A	G	C	C	T / C	T	T	A / G	C	G
I114			A / G	T	G / A	T	G / C	A	A	C	T / C	FAIL	FAIL	G	A	T / A	C	G / A	T	T	A	T / C	C	G / T	C	T	A	T	T / C	G / A	C / T	T / C	G	G / T	C	T / C	A	T	T	T / A	G / A	C	C / A	T	T / C	T / C	A / G	C	G
I115			A	T	G	T	G	A	A	C	T	C	G	G	A	T	C	G	T	T	A	T	C	G / T	C	T / C	A	T / C	T	G / A	C	T	G	G	C	T / C	A / C	T	T	T	G	C	C / A	T	T	T	A	C	G
I116			A / G	T	G / A	T	G / C	A	A	C	T / C	FAIL	G	G	A	T / A	C / T	G / A	T	T	A	T / C	C	G	C	T / C	A	T / C	T / C	G	C / T	T / C	G	G / T	C	T	A / C	T	T	T / A	G / A	C / A	C	T	T / C	T / C	A / G	C	G / A
I117			A / G	T	G / A	T / C	G / C	A	A	C / T	T / C	FAIL	G	G / T	A	T / A	C / T	G / A	T / A	T / C	A	T / C	C / T	G / T	C / A	T / C	A / G	T / C	T / C	G / A	C / T	T / C	G	G / T	C	T / C	A / C	T / C	T / C	T / A	G / A	C / A	C / A	T / C	T / C	T / C	A / G	C	G / A
I118			A	T	G	T	G	A	A	C / T	T	C	FAIL	G	A	T	C / T	G	T	T / C	A	T	C	G	C	T / C	A	T / C	T	G	C	T	G	G	C	T	A / C	T / C	T	T	G	C / A	C	T / C	T	T	A	C	G / A
I119			A	T	G / A	T	G	A	A	C	T / C	FAIL	G	G	A	T / A	C	G / A	T	T	A	T / C	C	G	C	T	A	T	T / C	G	C	T	G	G	C	T	A	T	T	T	G / A	C	C	T	T / C	T	A	C	G
I120			A / G	T	G / A	T	G / C	A	A	C	T / C	C	FAIL	G	A	T / A	C	G / A	T	T	A	T / C	C	G / T	C	T / C	A	T / C	T / C	G / A	C	T	G	G	C	T / C	A / C	T	T	T	G / A	C / A	C / A	T	T / C	T / C	A	C	G
I121			A / G	T	G	T	G / C	A	A	C	T / C	C	FAIL	G	A	T	C	G / A	T	T	A	T / C	C	G / T	C	T	A	T	T / C	G / A	C	T	G	G	C	T / C	A	T	T	T	G / A	C	C / A	T	T	T / C	A	C	G
I122			A / G	T	G / A	T	G / C	A	A	C	T / C	FAIL	FAIL	G	A	T / A	C	G / A	T	T	A	T / C	C	G / T	C	T	A	T	T / C	G / A	C	T	G	G	C	T / C	A	T	T	T	G / A	C	C / A	T	T / C	T / C	A	C	G
I123			A / G	T	G	T	G / C	A	A	C	T	C / T	G	G	A	T	C	G	T	T	A	T	C	G / T	C	T	A	T	T	G / A	C / T	T / C	G	G / T	C	T / C	A	T	T	T / A	G	C	C / A	T	T	T / C	A / G	C	G
I124			A	T / G	G	T / C	G	A	A	C	T	FAIL	FAIL	G	A	T / A	C	G	T / A	T	A / G	T	C / T	G	C / A	T	A / G	T	T	G	C	T	G / A	G	C	T	A	T	T / C	T	G / A	C	C	T	T	T	A	C	G
I125			A	T / G	G	T / C	G	A	A	C / T	T	FAIL	FAIL	G / T	A	T	C / T	G	T / A	T / C	A / G	T	C / T	G	C / A	T / C	A / G	T / C	T	G	C	T	G / A	G	C	T	A / C	T / C	T / C	T	G	C / A	C	T / C	T	T	A	C	G / A
I126			A / G	T / G	G / A	T	G / C	A	A	C	T / C	C / T	FAIL	G	A	T / A	C	G / A	T	T	A	T / C	C	G / T	C	T	A	T	T / C	G / A	C / T	T / C	G	G / T	C	T / C	A	T	T	T / A	G / A	C	C / A	T	T / C	T / C	A / G	C	G
I127			A	T / G	G / A	T / C	G	A	A	C / T	T	C / T	G / A	G / T	A	T	C / T	G	T / A	T / C	A / G	T	C / T	G	C / A	T / C	A / G	T / C	T	G	C / T	T / C	G / A	G / T	C	T	A / C	T / C	T / C	T / A	G	C / A	C	T / C	T / C	T	A / G	C	G / A
I128			A / G	T / G	G	T / C	G / C	A	A	C / T	T / C	C	FAIL	G / T	A	T	C / T	G / A	T / A	T / C	A / G	T / C	C / T	G / T	C / A	T / C	A / G	T / C	T / C	G / A	C	T	G / A	G	C	T / C	A / C	T / C	T / C	T	G / A	C / A	C / A	T / C	T	T / C	A	C	G / A
I129			A	T	G	T / C	G	A	A	C	T	FAIL	FAIL	G / T	A	T	C	G	T / A	T / C	A / G	T	C / T	G	C / A	T	A / G	T	T	G	C	T	G	G	C	T	A	T / C	T / C	T	G	C	C	T / C	T	T	A	C	G
I130			A / G	T	G / A	T	G	A	A	C	T / C	C / T	G	G	A	T / A	C	G / A	T	T	A	T / C	C	G	C	T	A	T	T / C	G	C / T	T / C	G	G / T	C	T	A	T	T	T / A	G / A	C	C	T	T / C	T	A / G	C	G
I131			A / G	T	G / A	T	G / C	A	A	C	T / C	C / T	G	G	A	T / A	C	G / A	T	T	A	T / C	C	G / T	C	T	A	T	T / C	G / A	C / T	T / C	G	G / T	C	T / C	A	T	T	T / A	G / A	C	C / A	T	T / C	T / C	A / G	C	G
I132			A	T / G	G / A	T	G	A	A	C	T	FAIL	FAIL	G	A	T	C	G	T	T	A	T	C	G	C	T	A	T	T	G	C / T	T / C	G / A	G / T	C	T	A	T	T	T / A	G	C	C	T	T	T	A / G	C	G
I133			A	T	G	T	G	A	A	C	T	FAIL	FAIL	G	A	T	C	G	T	T	A	T	C	G	C	T	A	T	T	G	C	T	G	G	C	T	A	T	T	T	G	C	C	T	T	T	A	C	G
I134			A / G	T	G / A	T	G / C	A	A	C	T / C	C / T	G	G	A	T / A	C	G / A	T	T	A	T / C	C	G	C	T	A	T	T / C	G	C	T	G	G	C	T	A	T	T	T / A	G / A	C	C	T	T / C	T / C	A	C	G
I135			A / G	T	G	T	G / C	A	A	C	T / C	C	G	G	A	T / A	C	G / A	T	T	A	T / C	C	G / T	C	T	A	T	T / C	G / A	C	T	G	G	C	T / C	A	T	T	T	G / A	C	C / A	T	T / C	T / C	A	C	G
I136			A	T / G	G	T	G	A	A	C	T	FAIL	FAIL	G	A	T	C	G	T	T	A / G	T	C / T	G / T	C	T	A	T	T	G / A	C / T	T / C	G / A	G	C	T / C	A	T	T	T	G	C	C	T	T	T	A / G	C	G
I137			A / G	T / G	G	T / C	G / C	A	A	C / T	T / C	FAIL	FAIL	G / T	A	T / A	C / T	G / A	T / A	T / C	A / G	T / C	C / T	G / T	C / A	T / C	A / G	T / C	T / C	G / A	C	T	G / A	G	C	T / C	A / C	T / C	T / C	T	G / A	C / A	C / A	T / C	T / C	T / C	A	C	G / A
I174			A / G	T	G / A	T / C	G / C	A	A	C / T	T / C	C / T	G / A	G / T	A	T / A	C / T	G / A	T / A	T / C	A / G	T / C	C / T	G / T	C / A	T / C	A / G	T / C	T / C	G / A	C	T	G / A	G	C	T / C	A / C	T / C	T / C	T	G / A	C / A	C / A	T / C	T / C	T / C	A	C	G / A
I175			A / G	T	G	T	G / C	A	A	C	T / C	C	G	G	A	T / A	C	G / A	T	T	A	T / C	C	G / T	C	T	A	T	T / C	G / A	C	T	G	G	C	T / C	A	T	T	T	G / A	C	C / A	T	T	T / C	A	C	G
I176			A	T	G / A	T / C	G	A	A	C / T	T	FAIL	FAIL	G / T	A	T	C / T	G	T / A	T / C	A / G	T	C / T	G	C / A	T / C	A / G	T	T	G	C / T	T / C	G	G / T	C	T	A	T / C	T / C	T / A	G	C / A	C	T / C	T	T	A / G	C	G / A
I177			A / G	T / G	G	T / C	G / C	A	A	C / T	T / C	C	G / A	G / T	A	T / A	C / T	G / A	T / A	T / C	A / G	T / C	C / T	G / T	C / A	T / C	A / G	T / C	T / C	G / A	C	T	G / A	G	C	T / C	A / C	T / C	T / C	T	G / A	C / A	C / A	T / C	T / C	T / C	A	C	G / A
I178			A / G	T / G	G	T / C	G / C	A	A	C / T	T / C	FAIL	G / A	G / T	A	T / A	C / T	G / A	T / A	T / C	A / G	T / C	C / T	G / T	C / A	T / C	A / G	T / C	T / C	G / A	C	T	G / A	G	C	T / C	A / C	T / C	T / C	T	G / A	C / A	C / A	T / C	T / C	T / C	A	C	G / A
I179			A / G	T / G	G / A	T	G / C	A	A	C	T / C	FAIL	G	G	A	T / A	C	G / A	T	T	A	T / C	C	G / T	C	T	A	T	T / C	G / A	C / T	T / C	G / A	G / T	C	T / C	A	T	T	T / A	G / A	C	C / A	T	T / C	T / C	A / G	C	G
I180			A	T	G / A	T	G	A	A	C	T	C / T	G	G	A	T / A	C	G	T	T	A	T	C	G	C	T	A	T	T	G	C / T	T / C	G	G / T	C	T	A	T	T	T / A	G / A	C	C	T	T / C	T	A / G	C	G
I181			A	T / G	G	T	G	A	A	C	T	C	G / A	G	A	T	C	G	T	T	A / G	T	C / T	G	C	T	A	T	T	G	C	T	G / A	G	C	T	A	T	T	T	G	C	C	T	T	T	A	C	G
I182			A / G	T	G / A	T / C	G / C	A	A	C / T	T / C	C / T	G	G / T	A	T / A	C / T	G / A	T / A	T / C	A	T / C	C / T	G / T	C / A	T / C	A / G	T / C	T / C	G / A	C / T	T / C	G	G / T	C	T / C	A / C	T / C	T / C	T / A	G / A	C / A	C / A	T / C	T / C	T / C	A / G	C	G / A
I184			A / G	T / G	G / A	T / C	G / C	A	A	C / T	T / C	C / T	G / A	G / T	A	T / A	C / T	G / A	T / A	T / C	A / G	T / C	C / T	G / T	C / A	T / C	A / G	T / C	T / C	G / A	C / T	T	G / A	G / T	C	T / C	A / C	T / C	T / C	T / A	G / A	C / A	C / A	T / C	T / C	T / C	A / G	C	G / A
I185			A	T / G	G	T / C	G	A	A	C / T	T	C	G / A	G / T	A	T	C / T	G	T / A	T / C	A / G	T	C / T	G	C / A	T / C	A / G	T / C	T	G	C	T	G / A	G	C	T	A / C	T / C	T / C	T	G	C / A	C	T / C	T	T	A	C	G / A
I186			A / G	T	G / A	T	G / C	A	A	C	T / C	C / T	G	G	A	T / A	C	G / A	T	T	A	T / C	C	G / T	C	T	A	T	T / C	G / A	C / T	T / C	G	G / T	C	T / C	A	T	T	T / A	G / A	C	C / A	T	T / C	T / C	A / G	C	G
I187			A / G	T	G / A	T	G / C	A	A	C	T / C	C / T	G	G	A	T / A	C	G / A	T	T	A	T / C	C	G / T	C	T	A	T	T / C	G / A	C / T	T / C	G	G / T	C	T / C	A	T	T	T / A	G / A	C	C / A	T	T / C	T / C	A / G	C	G
I188			A / G	T / G	G / A	T	G / C	A	A	C	T / C	C / T	G / A	G	A	T / A	C	G / A	T	T	A / G	T / C	C / T	G / T	C / A	T	A	T	T / C	G / A	C / T	T / C	G / A	G / T	C	T / C	A	T	T	T / A	G / A	C	C / A	T	T / C	T / C	A / G	C	G
I189			A	T	G / A	T	G	A	A	C	T	C / T	G	G	A	T / A	C	G / A	T	T	A	T	C	G	C	T	A	T	T	G	C / T	T / C	G	G / T	C	T	A	T	T	T / A	G / A	C	C	T	T / C	T	A / G	C	G
I190			A	T / G	G	T / C	G	A	A	C / T	T	C	G / A	G / T	A	T	C / T	G	T / A	T / C	A / G	T	C / T	G	C / A	T / C	A / G	T / C	T	G	C	T	G / A	G	C	T	A / C	T / C	T / C	T	G	C / A	C	T / C	T	T	A	C	G / A
I191			A / G	T	G / A	T	G / C	A	A	C	T / C	FAIL	FAIL	G	A	T / A	C	G / A	T	T	A	T / C	C	G / T	C	T / C	A	T / C	T / C	G / A	C / T	T / C	G	G / T	C	T / C	A / C	T	T	T / A	G / A	C / A	C / A	T	T / C	T / C	A / G	C	G
I192			A / G	T	G / A	T	G / C	A	A	C	T / C	FAIL	G	G	A	T / A	C	G / A	T	T	A	T / C	C	G / T	C	T	A	T	T / C	G / A	C / T	T / C	G	G / T	C	T / C	A	T	T	T / A	G / A	C	C / A	T	T / C	T / C	A / G	C	G
I193			A / G	T	G / A	T	G / C	A	A	C / T	T / C	C / T	G	G	A	T / A	C / T	G / A	T	T	A	T / C	C	G	C	T / C	A	T / C	T / C	G	C	T	G	G	C	T	A / C	T	T	T	G / A	C / A	C	T / C	T / C	T / C	A	C	G / A
I194			A / G	T	G	T	G / C	A	A	C	T / C	C	G	G	A	T / A	C	G / A	T	T	A	T / C	C	G / T	C	T	A	T	T / C	G / A	C	T	G	G	C	T / C	A	T	T	T	G / A	C	C / A	T	T	T / C	A	C	G
I195			A / G	T	G / A	T	G / C	A	A	C	T / C	FAIL	G	G	A	T / A	C	G / A	T	T	A	T / C	C	G / T	C	T	A	T	T / C	G / A	C / T	T / C	G	G / T	C	T / C	A	T	T	T / A	G / A	C	C / A	T	T / C	T / C	A / G	C	G
I196			A / G	T	G / A	T	G / C	A	A	C	T / C	C / T	G	G	A	T / A	C	G / A	T	T	A	T / C	C	G / T	C	T	A	T	T / C	G / A	C / T	T / C	G	G / T	C	T / C	A	T	T	T / A	G / A	C	C / A	T	T / C	T / C	A / G	C	G
I197			A / G	T	G	T	G	A	A	C / T	T / C	C	G	G	A	T / A	C / T	G / A	T	T	A	T / C	C	G	C	T / C	A	T / C	T / C	G	C	T	G	G	C	T	A / C	T	T	T	G / A	C / A	C	T / C	T / C	T	A	C	G / A
I198			A	T	G	T	G	A	A	C / T	T	FAIL	G	G	A	T	C / T	G	T	T	A	T	C	G / T	C	T / C	A	T / C	T	G / A	C / T	T / C	G	G / T	C	T / C	A / C	T / C	T	T / A	G	C / A	C / A	T / C	T	T	A / G	C	G / A
I199			A	T / G	G	T / C	G	A	A	C	T	C	FAIL	G / T	A	T	C	G	T / A	T / C	A / G	T	C / T	G	C / A	T	A / G	T	T	G	C	T	G / A	G	C	T	A	T / C	T / C	T	G	C	C	T	T	T	A	C	G
I200			A	T	G	T	G	A	A	C / T	T	C	G	G	A	T	C / T	G	T	T	A	T	C	G	C	T / C	A	T / C	T	G	C	T	G	G	C	T	A / C	T	T	T	G	C / A	C	T	T	T	A	C	G / A
I201			A / G	T	G / A	T	G / C	A	A	C	T / C	C / T	G	G	A	T / A	C	G / A	T	T	A	T / C	C	G	C	T	A	T	T / C	G	C / T	T / C	G	G / T	C	T	A	T	T	T / A	G / A	C	C	T	T / C	T / C	A / G	C	G
I202			A	T / G	G	T	G / C	A	A	C	T	C	G / A	G	A	T	C	G	T	T	A / G	T	C	G / T	C	T	A	T	T	G / A	C	T	G / A	G	C	T / C	A	T	T	T	G	C	C / A	T	T	T	A	C	G
I215			A	T / G	G	T / C	G	A	A	C / T	T	C	G / A	G / T	A	T	C / T	G	T / A	T / C	A / G	T	C / T	G / T	C / A	T / C	A / G	T / C	T	G / A	C	T	G / A	G	C	T / C	A / C	T / C	T / C	T	G	C / A	C / A	T / C	T	T	A	C	G / A
I216			A / G	T / G	G	T	G / C	A	A	C	T / C	C	G / A	G	A	T	C	G / A	T	T	A / G	T / C	C / T	G / T	C	T	A	T	T / C	G / A	C	T	G / A	G	C	T / C	A	T	T	T	G	C	C / A	T	T	T / C	A	C	G
I217			A / G	T	G	T	G / C	A	A	C	T / C	C	G	G	A	T	C	G	T	T	A	T / C	C	G / T	C	T	A	T	T / C	G / A	C / T	T / C	G	G / T	C	T / C	A	T	T	T	G	C	C / A	T	T	T / C	A / G	C	G
I218			A	T / G	G	T / C	G	A	A	C / T	T	FAIL	FAIL	G / T	A	T	C / T	G	T / A	T / C	A / G	T	C / T	G	C / A	T / C	A / G	T / C	T	G	C	T	G / A	G	C	T	A / C	T / C	T / C	T	G	C / A	C	T / C	T	T	A	C	G / A
I219			A / G	T / G	G / A	T / C	G / C	A	A	C / T	T / C	FAIL	FAIL	G / T	A	T / A	C / T	G / A	T / A	T / C	A / G	T / C	C / T	G / T	C / A	T / C	A / G	T / C	T / C	G / A	C / T	T / C	G / A	G / T	C	T / C	A / C	T / C	T / C	T / A	G / A	C / A	C / A	T / C	T / C	T / C	A / G	C	G / A
I220			A / G	T / G	G	T / C	G / C	A	A	C / T	T / C	C	G / A	G / T	A	T	C / T	G / A	T / A	T / C	A / G	T / C	C / T	G / T	C / A	T / C	A / G	T / C	T / C	G / A	C	T	G / A	G	C	T / C	A / C	T / C	T / C	T	G / A	C / A	C / A	T / C	T	T / C	A	C	G / A
I221			A / G	T	G / A	T	G / C	A	A	C	T / C	C / T	G	G	A	T / A	C	G / A	T	T	A	T / C	C	G / T	C	T	A	T	T / C	G / A	C / T	T / C	G	G / T	C	T / C	A	T	T	T / A	G / A	C	C / A	T	T / C	T / C	A / G	C	G
I222			A	T / G	G	T	G	A	A	C	T	C	G	G	A	T	C	G	T	T	A	T	C	G	C	T	A	T	T	G	C / T	T / C	G / A	G / T	C	T	A	T	T	T	G	C	C	T	T	T	A / G	C	G
I223			A / G	T / G	G	T	G / C	A	A	C	T / C	C	G / A	G	A	T / A	C	G / A	T / A	T	A / G	T / C	C / T	G / T	C / A	T	A / G	T	T / C	G / A	C	T	G / A	G	C	T / C	A	T	T / C	T	G / A	C	C / A	T	T	T / C	A	C	G
I224			A	T / G	G	T	G	A	A	C	T	FAIL	FAIL	G	A	T	C	G	T	T	A / G	T	C / T	G	C	T	A	T	T	G	C	T	G / A	G	C	T	A	T	T	T	G	C	C	T	T	T	A	C	G
I225			A / G	T	G / A	T	G / C	A	A	C	T / C	FAIL	FAIL	G	A	T / A	C	G / A	T	T	A	T / C	C	G / T	C	T	A	T	T / C	G / A	C	T	G	G	C	T / C	A	T	T	T	G / A	C	C / A	T	T / C	T / C	A	C	G
I226			A	T	G	T	G	A	A	C	T	FAIL	FAIL	G	A	T	C	G	T	T	A	T	C	G	C	T	A	T	T	G	C	T	G	G	C	T	A	T	T	T	G	C	C	T	T	T	A	C	G
I227			A / G	T	G / A	T / C	G / C	A	A	C / T	T / C	FAIL	G	G / T	A	T / A	C / T	G / A	T / A	T / C	A	T / C	C	G	C	T / C	A / G	T / C	T / C	G	C	T	G	G / T	C	T	A / C	T / C	T / C	T / A	G / A	C / A	C	T / C	T / C	T / C	A	C	G / A
I228			A / G	T / G	G	T / C	G / C	A	A	C / T	T / C	C	G / A	G / T	A	T / A	C / T	G / A	T / A	T / C	A / G	T / C	C / T	G / T	C / A	T	A / G	T	T / C	G / A	C	T	G / A	G	C	T / C	A	T / C	T / C	T	G / A	C / A	C / A	T / C	T / C	T / C	A	C	G / A
I229			A	T	G	T	G	A	A	C	T	C	G	G	A	T	C	G	T	T	A	T	C	G	C	T	A	T	T	G	C	T	G	G	C	T	A	T	T	T	G	C	C	T	T	T	A	C	G
I230			A / G	T	G / A	T	G / C	A	A	C / T	T / C	C / T	G	G	A	T / A	C / T	G / A	T	T	A	T / C	C	G / T	C	T / C	A	T / C	T / C	G / A	C / T	T / C	G	G / T	C	T / C	A / C	T	T	T / A	G / A	C / A	C / A	T	T / C	T / C	A / G	C	G / A
I231			A / G	T	G / A	T	G / C	A	A	C	T / C	FAIL	G	G	A	T / A	C	G / A	T	T	A	T / C	C	G / T	C	T	A	T	T / C	G / A	C / T	T / C	G	G / T	C	T / C	A	T	T	T / A	G / A	C	C / A	T	T / C	T / C	A / G	C	G
I232			A / G	T	G	T / C	G / C	A	A	C / T	T / C	FAIL	FAIL	G / T	A	T	C / T	G	T / A	T / C	A	T / C	C	G / T	C / A	T / C	A / G	T	T	G / A	C	T	G	G	C	T / C	A / C	T / C	FAIL	T	G	C / A	C / A	T / C	T	T / C	A	C	G / A
I233			A / G	T / G	G / A	T / C	G / C	A	A	C / T	T / C	FAIL	FAIL	G / T	A	T / A	C / T	G / A	T / A	T / C	A / G	T / C	C / T	G	C / A	T / C	A / G	T / C	T / C	G	C / T	T / C	G / A	G / T	C	T	A / C	T / C	T / C	T / A	G / A	C / A	C	T / C	T / C	T / C	A / G	C	G / A
I235			A / G	T / G	G	T	G / C	A	A	C	T / C	C	G / A	G	A	T / A	C	G / A	T / A	T	A / G	T / C	C / T	G / T	C / A	T	A / G	T	T / C	G / A	C	T	G / A	G	C	T / C	A	T	T / C	T	G / A	C	C / A	T	T / C	T / C	A	C	G
I236			A / G	T	G / A	T	G / C	A	A	C	T / C	FAIL	FAIL	G	A	T / A	C	G / A	T	T	A	T / C	C	G / T	C	T	A	T	T / C	G / A	C / T	T / C	G	G / T	C	T / C	A	T	T	T / A	G / A	C	C / A	T	T / C	T / C	A / G	C	G
I237			A / G	T / G	G / A	T	G / C	A	A	C	T / C	FAIL	FAIL	G	A	T / A	C	G / A	T	T	A / G	T / C	C / T	G	C / A	T	A	T	T / C	G	C / T	T / C	G / A	G / T	C	T	A	T	T / C	T / A	G / A	C	C	T	T / C	T / C	A / G	C	G
I238			A / G	T	G / A	T	G / C	A	A	C	T / C	C / T	G	G	A	T / A	C	G / A	T	T	A	T / C	C	G / T	C	T	A	T	T / C	G / A	C / T	T / C	G	G / T	C	T / C	A	T	T	T / A	G / A	C	C / A	T	T / C	T / C	A / G	C	G
I239			A / G	T	G / A	T	G / C	A	A	C / T	T / C	C / T	G	G	A	T / A	C / T	G / A	T	T	A	T / C	C	G / T	C	T / C	A	T / C	T / C	G / A	C	T	G	G / T	C	T / C	A / C	T	T	T / A	G / A	C / A	C / A	T	T / C	T / C	A	C	G / A
I240			A / G	T / G	G / A	T / C	G / C	A	A	C / T	T / C	C	G / A	G / T	A	T / A	C / T	G / A	T / A	T / C	A / G	T / C	C / T	G	C / A	T / C	A / G	T / C	T / C	G / A	C	T	G / A	G	C	T / C	A / C	T / C	T / C	T	G / A	C / A	C / A	T / C	T / C	T / C	A	C	G / A
I241			A	T	G	T / C	G / C	A	A	C / T	T	C	G	G / T	A	T	C / T	G	T	T / C	A	T	C	G / T	C	T / C	A	T / C	T	G / A	C	T	G	G	C	T / C	A / C	T / C	T	T	G	C / A	C / A	T / C	T	T	A	C	G / A
I242			A	T	G / A	T / C	G	A	A	C / T	T	FAIL	G	G / T	A	T	C / T	G	T / A	T / C	A / G	T	C / T	G / T	C / A	T / C	A / G	T / C	T	G / A	C / T	T / C	G	G / T	C	T / C	A / C	T / C	T / C	T / A	G	C / A	C / A	T / C	T	T	A / G	C	G / A
I243			A	T / G	G / A	T / C	G	A	A	C / T	T	FAIL	FAIL	G / T	A	T	C / T	G	T / A	T / C	A / G	T	C / T	G	C / A	T / C	A / G	T / C	T	G	C / T	T / C	G / A	G / T	C	T	A / C	T / C	T / C	T / A	G	C / A	C	T / C	T	T	A / G	C	G / A
I244			A / G	T / G	G / A	T	G / C	A	A	C	T / C	FAIL	G / A	G	A	T / A	C	G / A	T / A	T	A / G	T / C	C / T	G / T	C / A	T	A / G	T	T / C	G / A	C / T	T / C	G / A	G / T	C	T / C	A	T	T / C	T / A	G / A	C	C / A	T	T / C	T / C	A / G	C	G
I245			A	T / G	G	T / C	G / C	A	A	C / T	T	C	G / A	G / T	A	T	C / T	G	T / A	T / C	A / G	T	C / T	G / T	C / A	T / C	A / G	T / C	T	G / A	C	T	G / A	G	C	T / C	A / C	T / C	T / C	T	G	C / A	C / A	T / C	T	T / C	A	C	G / A
I246			A / G	T / G	G / A	T	G / C	A	A	C	T / C	FAIL	G	G	A	T / A	C	G / A	T	T	A	T / C	C	G	C	T	A	T	T / C	G / A	C / T	T / C	G / A	G / T	C	T / C	A	T	T	T / A	G / A	C	C / A	T	T / C	T / C	A / G	C	G
I247			A	T	G	T	G	A	A	C	T	C	G	G	A	T	C	G	T	T	A	T	C	G / T	C	T	A	T	T	G	C	T / C	G	G	C	T	A	T	T	T	G	C	C	T	T	T	A	C	G
I248			A	T / G	G	T / C	G	A	A	C	T	C	G / A	G / T	A	T	C	G	T / A	T / C	A / G	T	C / T	G / T	C / A	T	A / G	T	T	G / A	C / T	T / C	G / A	G / T	C	T / C	A	T / C	T / C	T	G	C	C / A	T / C	T	T	A / G	C	G
I249			A	T / G	G	T / C	G / C	A	A	C / T	T	C	G / A	G / T	A	T	C / T	G	T / A	T / C	A / G	T	C / T	G / T	C / A	T	A / G	T	T	G / A	C	T	G / A	G	C	T / C	A	T / C	T / C	T	G	C / A	C / A	T / C	T	T	A	C	G / A
I250			A / G	T	G / A	T	G / C	A	A	C	T / C	FAIL	G	G	A	T / A	C	G / A	T	T	A	T / C	C	G / T	C	T	A	T	T / C	G / A	C	T	G	G	C	T / C	A	T	T	T / A	G / A	C	C / A	T	T / C	T / C	A	C	G
I251			A / G	T	G / A	T	G / C	A	A	C / T	T / C	FAIL	FAIL	G	A	T / A	C / T	G / A	T	T	A	T / C	C	G / T	C	T / C	A	T / C	T / C	G / A	C / T	T / C	G	G / T	C	T / C	A / C	T / C	T	T / A	G / A	C / A	C / A	T / C	T / C	T / C	A / G	C	G / A
I252			A	T / G	G / A	T / C	G	A	A	C / T	T	C / T	FAIL	G / T	A	T	C / T	G	T / A	T / C	A / G	T	C / T	G	C / A	T / C	A / G	T / C	T	G	C / T	T / C	G / A	G / T	C	T	A / C	T / C	T / C	T / A	G	C / A	C	T / C	T / C	T	A / G	C	G / A
I253			A / G	T	G / A	T	G / C	A	A	C / T	T / C	FAIL	G	G	A	T / A	C / T	G / A	T	T	A	T / C	C	G / T	C	T / C	A	T / C	T / C	G / A	C / T	T / C	G	G / T	C	T / C	A / C	T	T	T / A	G / A	C / A	C / A	T / C	T / C	T / C	A / G	C	G / A
I254			A / G	T / G	G / A	T / C	G / C	A	A	C / T	T / C	C / T	G / A	G / T	A	T / A	C / T	G / A	T / A	T / C	A / G	T / C	C / T	G / T	C / A	T / C	A / G	T / C	T / C	G / A	C / T	T / C	G / A	G / T	C	T / C	A / C	T / C	T / C	T / A	G / A	C / A	C / A	T / C	T / C	T / C	A / G	C	G / A
I255			A	T	G / A	T	G	A	A	C	T	C / T	G	G	A	T	C	G	T	T	A	T	C	G / T	C	T	A	T	T	G	C / T	T / C	G	G / T	C	T	A	T	T	T / A	G	C	C	T	T / C	T	A / G	C	G
I256			A	T / G	G	T	G	A	A	C	T	C	G / A	G	A	T	C	G	T	T	A / G	T	C	G / T	C	T	A	T	T	G	C	T	G / A	G	C	T	A	T	T	T	G	C	C	T	T	T	A	C	G
I257			A / G	T	G / A	T / C	G / C	A	A	C / T	T / C	C / T	FAIL	G / T	A	T / A	C / T	G / A	T / A	T / C	A	T / C	C	G / T	C	T / C	A / G	T / C	T / C	G / A	C / T	T / C	G	G / T	C	T / C	A / C	T / C	T / C	T / A	G / A	C / A	C / A	T / C	T / C	T / C	A / G	C	G / A
I258			A / G	T / G	G	T / C	G / C	A	A	C	T / C	C	FAIL	G / T	A	T	C	G	T / A	T / C	A / G	T / C	C / T	G / T	C / A	T	A / G	T	T / C	G / A	C	T	G / A	G	C	T / C	A	T / C	T / C	T	G	C	C / A	T / C	T	T / C	A	C	G
I259			A	T / G	G / A	T / C	G	A	A	C / T	T	FAIL	G / A	G / T	A	T	C / T	G	T / A	T / C	A / G	T	C / T	G	C / A	T	A / G	T	T	G	C / T	T / C	G / A	G / T	C	T	A	T / C	T / C	T / A	G	C / A	C	T / C	T / C	T	A / G	C	G / A
I260			A / G	T / G	G / A	T / C	G / C	A	A	C	T / C	C	G / A	G / T	A	T / A	C	G / A	T / A	T / C	A / G	T / C	C / T	G / T	C / A	T	A / G	T	T / C	G / A	C / T	T / C	G / A	G / T	C	T / C	A	T / C	T / C	T / A	G / A	C	C / A	T	T / C	T / C	A / G	C	G
I261			A	T	G	T	G	A	A	C	T	C	G	G	A	T	C	G	T	T	A	T	C	G	C	T	A	T	T	G	C	T	G	G	C	T	A	T	T	T	G	C	C	T	T	T	A	C	G
I262			A / G	T / G	G / A	T / C	G / C	A	A	C / T	T / C	C	G / A	G / T	A	T / A	C / T	G / A	T / A	T / C	A / G	T / C	C / T	G	C / A	T	A / G	T	T / C	G	C	T	G / A	G	C	T	A	T / C	T / C	T	G / A	C / A	C	T / C	T / C	T / C	A	C	G / A
I263			A	T	G	T	G	A	A	C	T	C	G	G	A	T	C	G	T	T	A	T	C	G	C	T	A	T	T	G	C / T	T / C	G	G	C	T	A	T	T	T	G	C	C	T	T	T	A / G	C	G
I264			A / G	T / G	G / A	T / C	G / C	A	A	C / T	T / C	C / T	G / A	G / T	A	T / A	C / T	G / A	T / A	T / C	A / G	T / C	C / T	G	C / A	T / C	A / G	T / C	T / C	G	C / T	T / C	G / A	G / T	C	T	A / C	T / C	T / C	T / A	G / A	C / A	C	T / C	T / C	T / C	A / G	C	G / A
I265			A / G	T / G	G / A	T / C	G / C	A	A	C / T	T / C	C / T	G / A	G / T	A	T / A	C / T	G / A	T / A	T / C	A / G	T / C	C / T	G / T	C / A	T / C	A / G	T / C	T / C	G / A	C	T	G / A	G	C	T / C	A / C	T / C	T / C	T / A	G / A	C / A	C / A	T / C	T / C	T / C	A	C	G / A
I266			A / G	T / G	G / A	T / C	G / C	A	A	C / T	T / C	C / T	G / A	G / T	A	T / A	C / T	G / A	T / A	T / C	A / G	T / C	C / T	G	C / A	T / C	A / G	T / C	T / C	G	C / T	T / C	G / A	G / T	C	T	A / C	T / C	T / C	T / A	G / A	C / A	C	T / C	T / C	T / C	A / G	C	G / A
I267			A	T	G	T / C	G	A	A	C / T	T / C	FAIL	FAIL	G / T	A	T / A	C / T	G / A	T / A	T / C	A	T / C	C / T	G	C / A	T / C	A / G	T / C	T / C	G	C	T	G	G	C	T	A / C	T / C	T / C	T	G / A	C / A	C	T / C	T	T	A	C	G / A
I269			A	T / G	G / A	T / C	G	A	A	C / T	T	C / T	FAIL	G / T	A	T / A	C / T	G / A	T / A	T / C	A / G	T	C / T	G	C / A	T / C	A / G	T / C	T	G	C / T	T / C	G / A	G / T	C	T	A / C	T / C	T / C	T / A	G / A	C / A	C	T / C	T / C	T	A / G	C	G / A
I270			A / G	T	G	T / C	G / C	A	A	C / T	T	C	G	G / T	A	T	C / T	G	T / A	T / C	A	T	C	G / T	C	T / C	A / G	T / C	T	G / A	C	T / C	G	G	C	T / C	A / C	T / C	T / C	T	G	C / A	C / A	T / C	T	T / C	A	C	G / A
I271			A / G	T / G	G / A	T / C	G / C	A	A	C / T	T / C	C / T	G / A	G / T	A	T / A	C / T	G / A	T / A	T / C	A / G	T / C	C / T	G / T	C / A	T / C	A / G	T / C	T / C	G / A	C / T	T / C	G / A	G / T	C	T / C	A / C	T / C	T / C	T / A	G / A	C / A	C / A	T / C	T / C	T / C	A / G	C	G / A
I272			A	T	G / A	T	G	A	A	C	T	C / T	G	G	A	T	C	G	T	T	A	T	C	G	C	T	A	T	T	G	C / T	T / C	G	G / T	C	T	A	T	T	T / A	G	C	C	T	T / C	T	A / G	C	G
I273			A / G	T / G	G / A	T / C	G / C	A	A	C / T	T / C	C / T	G / A	G / T	A	T / A	C / T	G / A	T / A	T / C	A / G	T / C	C / T	G / T	C / A	T / C	A / G	T / C	T / C	G / A	C / T	T / C	G / A	G / T	C	T / C	A / C	T / C	T / C	T / A	G / A	C / A	C / A	T / C	T / C	T / C	A / G	C	G / A
I274			A	T / G	G	T / C	G	A	A	C	T	C	G / A	G	A	T	C	G	T / A	T	A / G	T	C / T	G	C / A	T	A / G	T	T	G	C	T	G / A	G	C	T	A	T	T / C	T	G	C	C	T	T	T	A	C	G
I275			A	T	G / A	T	G	A	A	C	T	FAIL	FAIL	G	A	T	C	G	T	T	A	T	C	G / T	C	T / C	A	T / C	T	G / A	C / T	T / C	G	G / T	C	T / C	A / C	T	T	T / A	G	C	C / A	T	T	T	A / G	C	G
I276			A / G	T / G	G / A	T	G / C	A	A	C	T / C	FAIL	FAIL	G	A	T / A	C	G / A	T	T	A / G	T / C	C / T	G / T	C	T	A	T	T / C	G / A	C / T	T / C	G / A	G / T	C	T / C	A	T	T	T / A	G / A	C	C / A	T	T / C	T / C	A / G	C	G
I277			A / G	T / G	G / A	T / C	G / C	A	A	C / T	T / C	C / T	G / A	G / T	A	T / A	C / T	G / A	T / A	T / C	A / G	T / C	C / T	G / T	C / A	T / C	A / G	T / C	T / C	G / A	C / T	T / C	G / A	G / T	C	T / C	A / C	T / C	T / C	T / A	G / A	C / A	C / A	T / C	T / C	T / C	A / G	C	G / A
I278			A / G	T / G	G / A	T	G / C	A	A	C	T / C	C / T	G / A	G	A	T / A	C	G / A	T	T	A / G	T / C	C	G / T	C	T	A	T	T / C	G / A	C / T	T / C	G / A	G / T	C	T / C	A	T	T	T / A	G / A	C	C / A	T	T / C	T / C	A / G	C	G
I279			A / G	T	G / A	T / C	G / C	A	A	C / T	T / C	FAIL	G	G / T	A	T	C / T	G / A	T / A	T / C	A	T / C	C	G	C	T / C	A / G	T / C	T / C	G	C / T	T / C	G	G / T	C	T	A / C	T / C	T	T / A	G	C / A	C	T / C	T	T / C	A / G	C	G / A
I280			A / G	T	G / A	T	G / C	A	A	C	T / C	C / T	G	G	A	T / A	C	G / A	T	T	A	T / C	C	G / T	C	T	A	T	T / C	G / A	C / T	T / C	G	G / T	C	T / C	A	T	T	T / A	G / A	C	C / A	T	T / C	T / C	A / G	C	G
I281			A / G	T	G / A	T	G / C	A	A	C	T / C	C / T	FAIL	G	A	T / A	C	G / A	T	T	A	T / C	C	G / T	C	T	A	T	T / C	G / A	C / T	T	G	G / T	C	T / C	A	T	T	T / A	G / A	C	C / A	T	T / C	T / C	A / G	C	G
I282			A	T	G	T	G	A	A	C	T	C	G	G	A	T	C	G	T	T	A	T	C	G / T	C	T	A	T	T	G	C	T	G	G	C	T	A	T	T	T	G	C	C	T	T	T	A	C	G
I283			A	T	G	T	G / C	A	A	C	T	FAIL	FAIL	G	A	T	C	G	T	T	A	T	C	G / T	C	T	A	T	T	G / A	C	T	G	G	C	T / C	A	T	T	T	G	C	C / A	T	T	T	A	C	G
I284			A	T / G	G	T / C	G	A	A	C / T	T	C	G / A	G / T	A	T	C / T	G	T / A	T / C	A / G	T	C / T	G	C / A	T / C	A / G	T / C	T	G	C	T	G / A	G	C	T	A / C	T / C	T / C	T	G	C / A	C	T / C	T	T	A	C	G / A
I285			A	T / G	G	T / C	G	A	A	C / T	T	C	G / A	G / T	A	T	C / T	G	T / A	T / C	A / G	T	C / T	G / T	C / A	T / C	A / G	T / C	T	G	C	T / C	G / A	G	C	T	A / C	T / C	T / C	T	G	C / A	C	T / C	T	T	A	C	G / A
I286			A / G	T	G / A	T	G / C	A	A	C	T / C	C / T	G	G	A	T / A	C	G / A	T	T	A	T / C	C	G	C	T / C	A	T / C	T / C	G / A	C / T	T / C	G	G / T	C	T / C	A / C	T	T	T / A	G / A	C / A	C / A	T	T / C	T / C	A / G	C	G
I287			A / G	T / G	G / A	T	G / C	A	A	C	T / C	C / T	G	G	A	T / A	C	G / A	T	T	A	T / C	C	G	C	T	A	T	T / C	G / A	C / T	T / C	G / A	G / T	C	T	A	T	T	T / A	G / A	C	C / A	T	T / C	T / C	A / G	C	G
I288			A / G	T	G / A	T	G / C	A	A	C	T / C	C / T	G	G	A	T / A	C	G / A	T	T	A	T / C	C	G / T	C	T	A	T	T / C	G / A	C	T	G	G	C	T / C	A	T	T	T / A	G / A	C	C / A	T	T / C	T / C	A	C	G
I296			A	T / G	G	T / C	G	A	A	C / T	T	C	G / A	G / T	A	T	C	G	T / A	T / C	A / G	T	C / T	G	C / A	T	A / G	T	T	G	C	T	G / A	G	C	T	A	T / C	T / C	T	G	C	C	T / C	T	T	A	C	G
[truncated: 70 more columns]
